# Supplementary material for: A mild and efficient oxidation of 2,3,6-trimethylphenol to trimethyl-1,4-benzoquinone with high-velocity air as an oxidant in a continuous-flow microreactor
Source: Royal Society of Chemistry journal article supplement (doi:10.1039/d4nj05103c), 2025-01-01
Supplement: d4nj05103c1.pdf [file d4nj05103c1.pdf]

## Supporting Information

### **A mild and efficient oxidation of 2,3,6-Trimethylphenol to Trimethyl-1,4-benzoquinone with high-velocity air as an oxidant in a continuous-flow microreactor**

Zilong Xie<sup>a</sup>, Siyi Yu<sup>a</sup>, Yanping Liu<sup>a</sup>, Jiankun Wu<sup>b</sup>, Jianzhi Wang<sup>a</sup>, Jie Liu<sup>a</sup>, Xiao Lin<sup>a</sup>, Faquan Yu<sup>\*a</sup>

<sup>a</sup>Key Laboratory for Green Chemical Process of Ministry of Education, Hubei Key Laboratory for Novel Reactor and Green Chemistry Technology

Hubei Engineering Research Center for Advanced Fine Chemicals

School of Chemical Engineering and Pharmacy,

Wuhan Institute of Technology, Wuhan 430073, China

<sup>b</sup>Yichang Humanwell Pharmaceutical Co., Ltd

No. 517, Donglin Road, Yichang 443005, Hubei, China

\*Corresponding author:

Faquan Yu<sup>\*a</sup>, Professor, PhD

Wuhan Institute of Technology

LiuFang Campus, No.206, Guanggu 1st road, Wuhan 430205, Hubei, China

E-mail address: fyu@wit.edu.cn

Tel: (86-27) 87194980; Fax: (86-27) 87194465

## Calibration curve of TMP 、TMQ

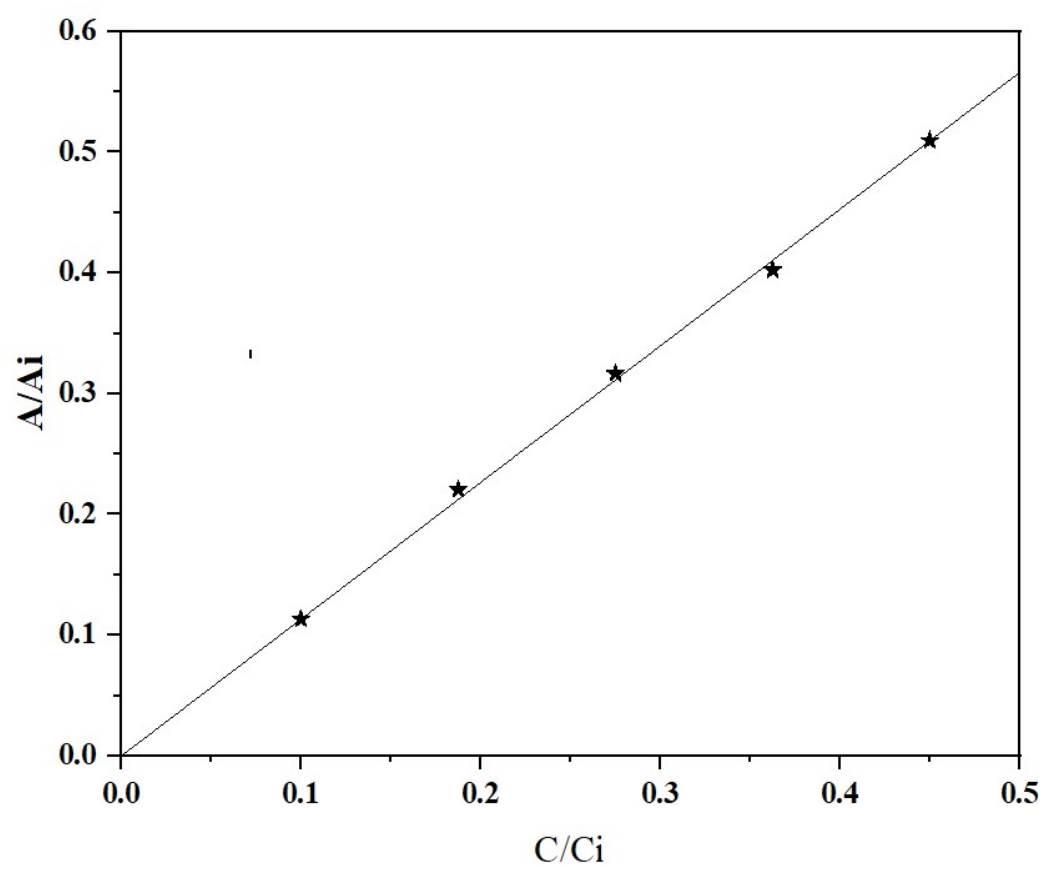

Figure 1. Calibration curve of TMP.

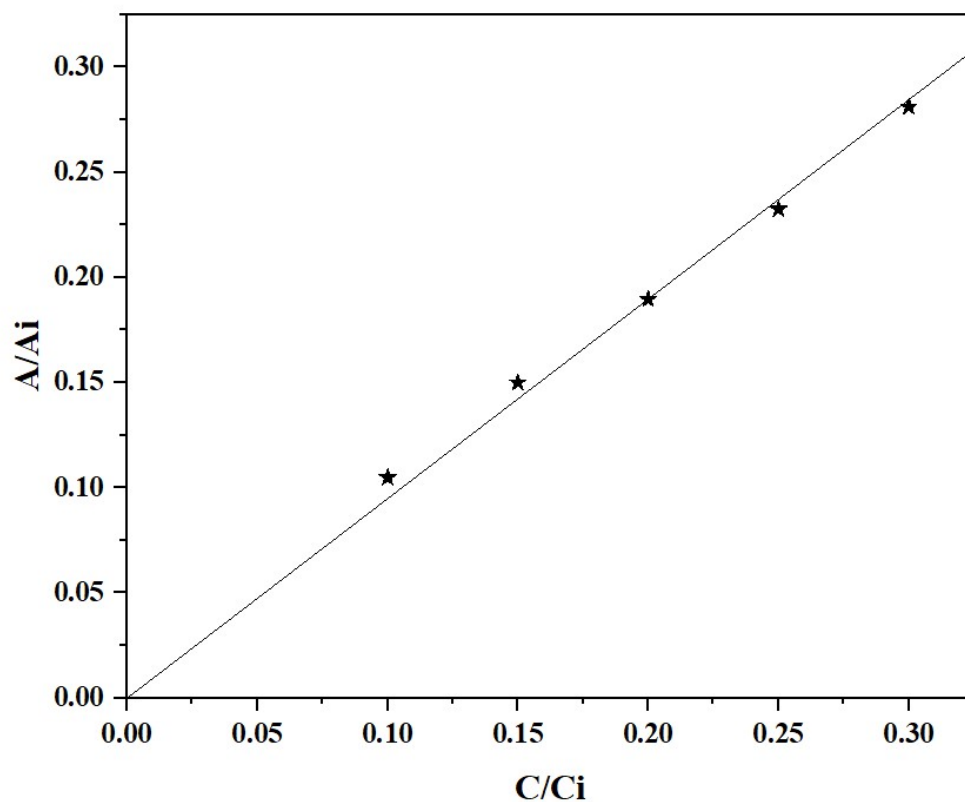

Figure 2. Calibration curve of TMQ.

## Chromatogram

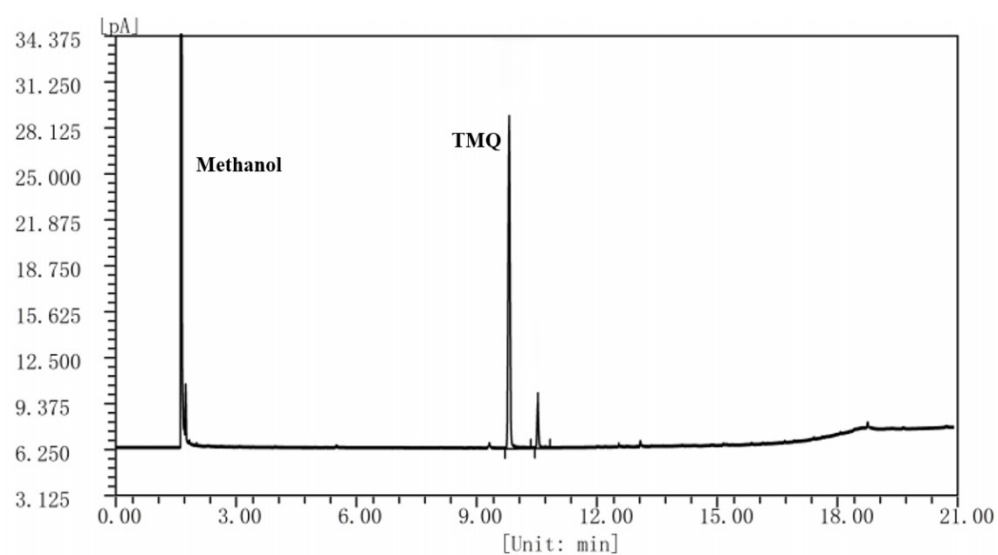

Figure 3. Chromatogram under optimal conditions

## **observation video**

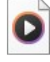

mmexport1741235612006.mp4
